# Supplementary material
Source: HighWire-hosted journal article supplement (https://www.cmajopen.ca/highwire/filestream/89320/field_highwire_adjunct_files/6/open-2021-0119-7-at.pdf)
Supplement: open-2021-0119-7-at.pdf [file open-2021-0119-7-at.pdf]

## APPENDIX 7: STUDY-LEVEL RISK OF BIAS ASSESSMENT

| Author, yr<br>(trial name)                                                                                                           | Sequence<br>generation | Allocation<br>concealment | Blinding* | Incomplete<br>outcome<br>data | Selective<br>outcome<br>reporting | Other<br>sources of<br>bias |
|--------------------------------------------------------------------------------------------------------------------------------------|------------------------|---------------------------|-----------|-------------------------------|-----------------------------------|-----------------------------|
| Collet 2014<br>(ARCTIC-INT) <sup>6</sup>                                                                                             | Low risk               | Low risk                  | Low risk  | Low risk                      | Low risk                          | Low risk                    |
| Gilard 2015<br>(ITALIC) <sup>3</sup>                                                                                                 | Low risk               | Low risk                  | Low risk  | Low risk                      | Low risk                          | Unclear                     |
| Helft 2016<br>(OPTIDUAL) <sup>2</sup>                                                                                                | Low risk               | Low risk                  | Low risk  | Low risk                      | Low risk                          | Unclear                     |
| Lee 2014<br>(DES-LATE) <sup>5</sup>                                                                                                  | Low risk               | Unclear                   | Low risk  | Low risk                      | Low risk                          | Low risk                    |
| Mauri 2014<br>(DAPT) <sup>4</sup>                                                                                                    | Low risk               | Low risk                  | Low risk  | Low risk                      | Low risk                          | Low risk                    |
| Nakamura 2017<br>(NIPPON) <sup>1</sup>                                                                                               | Low risk               | Low risk                  | Low risk  | Low risk                      | Low risk                          | Unclear                     |
| Valgimigli 2012<br>(PRODIGY) <sup>7</sup>                                                                                            | Low risk               | Low risk                  | Low risk  | Low risk                      | Low risk                          | Low risk                    |
| *Note: Open-label trials were judged to be at low risk of bias despite a lack of blinding if the outcomes were objectively assessed. |                        |                           |           |                               |                                   |                             |
